# Supplementary material for: Post-transcriptional control of nuclear-encoded cytochrome oxidase subunits in Trypanosoma brucei: evidence for genome-wide conservation of life-cycle stage-specific regulatory elements
Source: PubMed Central journal article supplement — Nucleic Acids Res. 2006 Sep 29;34(18):5312–24. doi: 10.1093/nar/gkl598 (PMC1636420; doi:10.1093/nar/gkl598), 2006-09-29
Supplement: nar_gkl598_1.pdf [file nar_gkl598_1.pdf]

## Supplementary Figure 1.

DNA sequence of the *cox* 3'UTRs analysed in this study.

Sequences shown are from the *CAT* 'STOP' codon to the downstream 'ATG' of phleomycin. Sequence in black type is *COX* intergenic region from *COX* V (A), *COX* VI (B), or *COX* IX (C). The actin 5'UTR of the phleomycin gene is shown in blue type. The major mapped sites of polyadenylation for endogenous *cox* transcripts are denoted by 'A' in larger font. Nucleotides in pink type mark the beginning of *COX* sequence in the deletion series constructs. Type in italics shows *Bam*HI and *Bbs*I restriction sites used for cloning purposes.

### cox V

TAA<sup>GGATCC</sup>TAGCTTTAGTATCTTCACGGATGGGGTTATTACTTCCATTTTTATTTTTTTGATTGTTTTAAGGT  
AGGACCATAGCCATACTAGTATAACACCCAATGGGTTGAGTTGATGTAAAGGACTGTATTCCGTCGTTTTGTTAGCCT  
GTTTTGTTGACACATACATATATATCTTTTACCCCTTACCCTAGCGGAGGGTGTGGAAACATACATACGTTTTCT  
CTGGGTGGGCGAAACATAATTTGCTGCTTTTGGAAATGTGCGCTATGTTTCTTCTCGGTGTATCTGTTTTACTCTAACTT  
TTCTATCCTTTTGTACCAGCTGACCTTTTTTTTATTGGGTAAAAACATGTCAAGCATGTTTCAGCAAGGTTCTG  
AAATTCATGTTTTTTTTTTTTTACTCTGCATTGCAGTCTCCGCTCTTATTAGTTTTGCTTTACGTAAGGTCTCGTTG  
CTGCCATAAAATAAGCTATCACCATG

### cox VI

TAA<sup>GGATCC</sup>TTAGTGACGAAAAGGTTGTCTTAGTAGTAGCGATCGTTCCCTTTCTTTGTAGCATAATTCCTCAT  
GTATTTCTTTAGCTTATTAGTA TGGGTGCGTTTTCAAGGGGTTGTTCTTGGGTAGCGGAAGTGTGTTGGAATTGGAAA  
AGTTACTATTCTGTCTCATTCTTATTTTTCTATGGCTATCATACTGAGGGAGTTTTTTTTGCCATTTGCGGATTA  
TTGCCTAACCGCTTGGTTTTATAGACTTTTTGATTTGCTTTCCCTTCATCATCTTTATGCTTTTTCTGTTGATTTCTCCTC  
CTATCCATTTATGAAAGAAGAAAGTTTCATCTTTTTTTGTTTGTCTTGTCTTTGTAATACTCGCCTGCCAGCAAGGTTCT  
CTGAAATTCATGTTTTTTTTTTTTTACTCTGCATTGCAGTCTCCGCTCTTATTAGTTTTGCTTTACGTAAGGTCTCGTT  
GCTGCCATAAAATAAGCTATCACCATG

### coxIX

TAA<sup>GGATCC</sup>TACCCAGTAGAAGGGAAAAAGAAACAGGGATTAATGGTATGGTTCGTAGGAGTGTACA GCAAGT  
CTATTTATTATTGCGTTCAAACACAGTCTATTATATATAACATATGTATATATGAAGAATAGGAGGCGATGTAACGAT  
TATTGTTATTATTTTTCTCGCAGGCATCTGTGTTATGCTGGTTGGTTTGTGCATCCTTAAGTATATACATGCTATC  
GATTTATTAGGATACCGAGGTGGAATAGGTGCGTAGTGAAGGGTATTGTTGGGCTAGGTATTTTTATTCTGTTTTCT  
AGGGCGCTAACGTGATGTTTTTCTGATTTGCCTTAGCCATTGTACTTTAATTTGGTGAATATTTTACACATTGCA  
CGAGTATATTTCCCCCTTACCCTTTATCATCTCTGATTAATCCCTCCGTATAGGTGGACAGCAAGGTTCTTGAA  
ATTCATGTTTTTTTTTTTTTACTCTGCATTGCAGTCTCCGCTCTTATTAGTTTTGCTTTACGTAAGGTCTCGTTGCT  
GCCATAAAATAAGCTATCACCATG
