# Supplementary material for: Post-transcriptional control of nuclear-encoded cytochrome oxidase subunits in Trypanosoma brucei: evidence for genome-wide conservation of life-cycle stage-specific regulatory elements
Source: PubMed Central journal article supplement — Nucleic Acids Res. 2006 Sep 29;34(18):5312–24. doi: 10.1093/nar/gkl598 (PMC1636420; doi:10.1093/nar/gkl598), 2006-09-29
Supplement: nar_gkl598_2.pdf [file nar_gkl598_2.pdf]

## Supplementary Figure 2.

Full Alignment between the 3'UTR of EP1 procyclin and coxV.

QuickTime™ and a  
TIFF (Uncompressed) decompressor  
are needed to see this picture.
