# Supplementary material for: Post-transcriptional control of nuclear-encoded cytochrome oxidase subunits in Trypanosoma brucei: evidence for genome-wide conservation of life-cycle stage-specific regulatory elements
Source: PubMed Central journal article supplement — Nucleic Acids Res. 2006 Sep 29;34(18):5312–24. doi: 10.1093/nar/gkl598 (PMC1636420; doi:10.1093/nar/gkl598), 2006-09-29
Supplement: nar_gkl598_3.pdf [file nar_gkl598_3.pdf]

### Supplementary Table 1.

Alignment of the region of all procyclic enriched transcripts containing the 26mer core element TATTTTTT. Where more than one copy of the element within the 3'UTR of a given gene is present, this is annotated “\_B” or “\_C”.

#### Procyclic genes with tatttttt oligomer

|                  | 10                | 20                      | 30                        | 40                                            |
|------------------|-------------------|-------------------------|---------------------------|-----------------------------------------------|
| EP_26mer_plus10  | T T C A T         | T T A A                 | T A T A T A               | T T T T G G T G A C A                         |
| Tb927.5.440_A    | A G C A C G G     | T A T T T T T T T T T T | T C T C T T T             | T A T C A C A T G A T C                       |
| Tb09.211.4070_B  | T A A C T         | T C T T                 | T A T T T T T T T T T T   | T A T T T A T T T T C A A A A G A C A         |
| Tb09.160.5470_A  | C G G T           | T C G A T               | T A T T T T T T T T T T   | T T G T A T T T T                             |
| Tb09.160.4310_A  | A C G T           | T T A T                 | T A T T T T T T T T T T   | T A C T T T T T T T A C T T G T T T           |
| Tb927.3.5130_A   | C T G C           | T A T T T T T T T T T T | C T T T T C T             | T T T G T T G T T C T T                       |
| Tb927.6.480_A    | A C A C G C A     | T T A A                 | T A T T T T T T T T T T   | C A A C C C A T T T T T T T G A G T T C       |
| Tb11.02.4485_A   | A C T C G         | T C T A                 | T A T T T T T T T T T T   | T G T T T T T T A T G C T T G A C G T T       |
| Tb09.160.4320_A  | A A C G T T       | T A T T                 | T A T T T T T T T T T T   | T A C T T T T T T T T A C T T G T             |
| Tb927.4.4730_A   | T G T T           | T C T T                 | T A T T T T T T T T T T   | C T A A A A T T T A A T T T A C T G T T G     |
| Tb11.02.312_A    | T A T G T         | T C T C                 | T A T T T T T T T T T T   | C T T T A T A T T T T A T T C G T C G C       |
| Tb10.70.4590_B   | C T C A A A A     | T T A A                 | T A T T T T T T T T T T   | C A T G C A C T T T C C A T C A G T T         |
| Tb927.6.520_A    | C A C G C A       | T T A A                 | T A T T T T T T T T T T   | T C A A C C C A T T T T T T T G A G T T C T T |
| Tb927.6.510_B    | T T T C A C       | T T C T                 | T A T T T T T T T T T T   | T C A T T C C T T T G A A T T T G A T C       |
| Tb927.8.7150_A   | A C T C A C C C   | T A T T T T T T T T T T | C T T A A C A T           | T T G T T G G T T A G C G                     |
| Tb927.5.2200_A   | T A T T A G       | T T A T                 | T A T T T T T T T T T T   | A A A T A C T T T C C T T G T T C A C         |
| Tb10.6k15.3510_A | T T A T T         | T A C C                 | T A T T T T T T T T T T   | C G T A G T C T T T G A G C C C A G T T       |
| Tb09.211.4400_A  | T T T T A C       | T T T T                 | T A T T T T T T T T T T   | T C A A T G T T G T T T A T C G T C T C       |
| Tb927.6.510_A    | T T T T C G       | T T A T                 | T A T T T T T T T T T T   | A G T T C T A T C C T T T A T T T T A T       |
| Tb09.211.3330_A  | T C C C T         | T C T T                 | T A T T T T T T T T T T   | A T T C T C C C T T T T T T C C C             |
| Tb11.01.6650_A   | T A G T T         | T T C C                 | T A T T T T T T T T T T   | A A C C C T T T C C C T T T C G G T T C       |
| Tb927.7.6990_A   | C T T T T         | T A T T                 | T A T T T T T T T T T T   | C C C C T C A A C T A T T T T C C G C G A     |
| Tb927.6.590_A    | T T T T G G       | T T G T                 | T A T T T T T T T T T T   | T T A C A T G A T A T T T T C T C T C         |
| Tb10.26.0790_A   | G A T G A G C G A | T A T T T T T T T T T T | A T T T T A C T C T       | T T T G T T G T T T                           |
| Tb927.5.2170_A   | C T A T T A G     | T T A T                 | T A T T T T T T T T T T   | A A A T A C T T T C C T T G T T C A C         |
| Tb09.160.4320_B  | C A T G C A       | T A T T                 | T A T T T T T T T T T T   | T A A A T T A T G G T T T A T G C             |
| Tb927.7.594_A    | C T T C T         | T T T T                 | T A T T T T T T T T T T   | A A A T T T G T T A A A A A A T T T T C C C   |
| Tb927.7.5970_A   | T T A T T A       | T T A T                 | T A T T T T T T T T T T   | A A T G T G T T C G T C C A T A T T T G T     |
| Tb10.70.4590_A   | C A A T T A       | T T G T                 | T A T T T T T T T T T T   | A T T A T T A C T T C T C A T T T C C         |
| Tb11.55.0011_A   | T A T C A         | T T A                   | T A T T T T T T T T T T   | A T G C T G T G A C G C A G G C T T T G T     |
| Tb09.v1.0490_A   | C T C T T G       | T C A A                 | T A T T T T T T T T T T   | C T G G T C T C A T G G A A A A G T T T T     |
| Tb927.5.2260_A   | T A T T A         | T T T                   | T A T T T T T T T T T T   | T C A G G G T G T A G A T A T T T G           |
| Tb09.160.0465_A  | T G A A C G       | T A T T                 | T A T T T T T T T T T T   | A T T T T T C G A G C A T A T A A A G C       |
| Tb10.6k15.2180_A | T T A T T G       | T T A T                 | T A T T T T T T T T T T   | C C T C G C A G G C A T C T G T G T A T       |
| Tb927.6.1640_A   | G G A A A T       | G T T T                 | T A T T T T T T T T T T   | A A C A T G G G C A T C G G C T G A T         |
| Tb09.160.5470_B  | T T G T A T       | T T T T                 | T A T T T T T T T T T T   | T T T T A A T G C T A A A A A T G A           |
| Tb927.8.6110_A   | T C G G T G       | T T T T                 | T A T T T T T T T T T T   | A C C C T A T A C A T A G A A T G G           |
| Tb09.160.5480_A  | G G T T T         | T T C T                 | T A T T T T T T T T T T   | T T T A A A A A G A A A A A A T A G           |
| Tb927.6.480_B    | T T T T G A       | G T T T                 | T A T T T T T T T T T T   | T T T A T G T C T T G G A A C C G T           |
| Tb09.v1.0420_A   | T T T T C T       | C A G G                 | T A T T T T T T T T T T   | C A G A T G A T T G G T A G G A A T           |
| Tb09.211.4070_A  | T A T T G         | T T A T                 | T A T T T T T T T T T T   | T T T T C A A A G C A C A T G T G             |
| Tb927.6.520_B    | T T T T G A       | G T T C                 | T A T T T T T T T T T T   | T T T A T G T C T T G G A A C C G C           |
| Tb927.5.1060_A   | A T T A C         | T A T A                 | T A T T T T T T T T T T   | T T T A A A T C T T C A T G T T G             |
| Tb927.7.4070_A   | C C C T G         | T C A T                 | T A T T T T T T T T T T   | T G A C A A T T C T C T A C T T C C           |
| Tb11.02.2310_A   | T C A T T         | T A A C                 | T A T T T T T T T T T T   | T C T A G C A T C G C G G C T A C T           |
| Tb927.1.2160_A   | G G A T G G       | T T T T                 | T A T T T T T T T T T T   | C A A A A A A A T C A C A C A T A T           |
| Tb927.7.6330_A   | C A C T C A       | A T A C                 | T A T T T T T T T T T T   | T T T T G T T A T C G A T C G T G G T G T     |
| Tb927.8.1890_A   | T T C T A A       | T C T T                 | T A T T T T T T T T T T   | C C C G G C T G A T C T G G C C G C T T       |
| Tb927.4.5080_A   | T G G C A G       | C C G T                 | T A T T T T T T T T T T   | T G T C A C C A C G G G C A A A G T T G G C   |
| Tb927.3.700_A    | T T T A C C       | T G G T                 | T A T T T T T T T T T T   | C C A A T T C T C A T A C A T A T A T A       |
| Tb11.03.0620_A   | T T T C T G       | T G T G                 | T A T T T T T T T T T T   | C T T T C G T T A C G G T A C A G A A         |
| Tb927.6.5130_A   | A A C G A         | T A T A                 | T A T T T T T T T T T T   | A C T G C A A T T A T G C C A A A A C A       |
| Tb927.7.4970_A   | T G T T C G       | T A T A                 | T A T T T T T T T T T T   | C T A A G T G A T A A C A C A T A T A T C     |
| Tb927.5.2160_A   | G A A T G G       | G T T T                 | T A T T T T T T T T T T   | C A A A A A A A A T C A A C A C A T A T       |
| Tb927.6.1640_B   | A A T A T         | T C G T                 | T A T T T T T T T T T T   | C C C T A A G A T T A A C T G T T C T T       |
| Tb927.4.3520_A   | A C T A T T       | T T C T                 | T A T T T T T T T T T T   | C C T A T A C A A T T G C G G T C G T G A     |
| Tb09.244.2420_A  | T T T T A         | G T T G                 | T A T T T T T T T T T T   | C C T T A T T                                 |
| Tb927.6.1640_C   | T T C T           | T A T C                 | G A T A T T T T T T T T T | A A A A A                                     |
| Tb09.244.2460_A  | T T T T A         | T T T C                 | A T T T T T T T T T T T   | A T T T T T T T C                             |
| Tb09.244.2530_A  | T T T T A         | G T T G                 | T A T T T T T T T T T T   | C C T T T A                                   |
| Tb09.160.4330_A  | C A T T T A       | T T A T                 | T A T T T T T T T T T T   | T G T T T                                     |
| Tb09.211.4400_B  | C G T T G A       | A A A C                 | T A T T T T T T T T T T   | A A A A A                                     |
| Tb927.5.2560_A   | T T A T T A       | T T G T                 | T A T T T T T T T T T T   | C T T A                                       |
| Tb09.244.2470_A  | T T T C A         | T T T T                 | T A T T T T T T T T T T   | C                                             |
| Tb927.4.4990_A   | G T T C G A       | T T G T                 | T A T T T T T T T T T T   | C                                             |
| Tb09.244.2480_A  | T T T T A         | G T T G                 | T A T T T T T T T T T T   | C                                             |
| Tb09.244.2500_A  | T T T T A         | G C T A                 | T A T T T T T T T T T T   | C                                             |

- - Y T W T Y W T T W T T A T T T T T T T T T T W W W W W W T W Y W W W W B K Y D Y T - - -
