# Supplementary material for: Post-transcriptional control of nuclear-encoded cytochrome oxidase subunits in Trypanosoma brucei: evidence for genome-wide conservation of life-cycle stage-specific regulatory elements
Source: PubMed Central journal article supplement — Nucleic Acids Res. 2006 Sep 29;34(18):5312–24. doi: 10.1093/nar/gkl598 (PMC1636420; doi:10.1093/nar/gkl598), 2006-09-29
Supplement: nar_gkl598_4.pdf [file nar_gkl598_4.pdf]

## Supplementary Table 2.

Procyclic enriched transcripts containing the element UAG(G)UA(G/U).

| LOCATION | GeneDB identifier | start | stop | motif   | Protein ID                                                              |
|----------|-------------------|-------|------|---------|-------------------------------------------------------------------------|
| MITO     | Tb927.3.1410      | 87    | 93   | TAGTAG  | cytochrome c oxidase VII, putative                                      |
| MITO     | Tb927.3.1410      | 96    | 102  | TAGTAG  | cytochrome c oxidase VII, putative                                      |
| MITO     | Tb10.6k15.2180    | 279   | 286  | TAGGTAT | cytochrome c oxidase subunit IX                                         |
| MITO     | Tb11.01.4702      | 103   | 110  | TAGGTAG | cytochrome c oxidase subunit X, putative                                |
| MITO     | Tb11.01.4702      | 159   | 165  | TAGTAG  | cytochrome c oxidase subunit X, putative                                |
| MITO     | Tb927.4.4620      | 112   | 118  | TAGTAG  | cytochrome c oxidase VIII (COX VIII), putative                          |
| MITO     | Tb927.4.4620      | 153   | 160  | TAGGTAG | cytochrome c oxidase VIII (COX VIII), putative                          |
| MITO     | Tb927.7.7420      | 64    | 71   | TAGGTAT | mitochondrial precursor,ATP synthase F1, alpha subunit                  |
|          | Tb09.244.2470     | 96    | 102  | TAGTAT  | BARP protein                                                            |
|          | Tb09.244.2460     | 96    | 102  | TAGTAT  | BARP protein                                                            |
|          | Tb09.244.2480     | 96    | 102  | TAGTAT  | BARP protein                                                            |
| MITO     | Tb927.8.1890      | 48    | 55   | TAGGTAT | cytochrome c1, heme protein, mitochondrial precursor                    |
| MITO     | Tb10.61.1830      | 252   | 258  | TAGTAG  | mitochondrial carrier protein, putative,ADP/ATP translocase 1, putative |
| MITO     | Tb10.100.0160     | 21    | 27   | TAGTAG  | cytochrome C oxidase subunit VI, putative                               |
| MITO     | Tb10.100.0160     | 85    | 91   | TAGTAT  | cytochrome C oxidase subunit VI, putative                               |
|          | Tb927.3.5340      | 145   | 151  | TAGTAG  | Hsc70-interacting protein (Hip), putative                               |
|          | Tb927.6.3490      | 91    | 97   | TAGTAG  | zinc finger protein ZFP1                                                |
| MITO     | Tb09.211.4700     | 232   | 238  | TAGTAG  | reiske iron-sulfur protein , mitochondrial precursor                    |
|          | Tb927.2.2510      | 166   | 173  | TAGGTAT | hypothetical protein, conserved                                         |
|          | Tb927.7.5940      | 248   | 254  | TAGTAG  | hypothetical protein, conserved                                         |
|          | Tb09.160.1100     | 260   | 266  | TAGTAG  | hypothetical protein, conserved                                         |
|          | Tb927.5.2200      | 130   | 136  | TAGTAT  | hypothetical protein, conserved                                         |
| MITO     | Tb927.4.3450      | 15    | 21   | TAGTAG  | hypothetical protein, conserved                                         |
|          | Tb927.4.5080      | 257   | 263  | TAGTAT  | hypothetical protein, conserved                                         |
| MITO?    | Tb927.8.6890      | 81    | 87   | TAGTAT  | hypothetical protein, conserved                                         |
|          | Tb927.8.6890      | 90    | 96   | TAGTAT  | hypothetical protein, conserved                                         |
|          | Tb927.8.6890      | 105   | 112  | TAGGTAT | hypothetical protein, conserved                                         |
| MITO     | Tb10.70.1520      | 10    | 16   | TAGTAG  | hypothetical protein, conserved                                         |
|          | Tb10.70.1520      | 96    | 102  | TAGTAT  | hypothetical protein, conserved                                         |
| MITO     | Tb927.3.1690      | 1     | 7    | TAGTAG  | hypothetical protein, conserved                                         |
|          | Tb10.70.2320      | 233   | 239  | TAGTAT  | hypothetical protein, conserved                                         |
| MITO     | Tb10.70.3010      | 262   | 268  | TAGTAT  | hypothetical protein, conserved                                         |
|          | Tb10.70.7760      | 79    | 85   | TAGTAG  | hypothetical protein, conserved                                         |
|          | Tb09.160.4390     | 146   | 152  | TAGTAT  | hypothetical protein, unlikely                                          |
|          | Tb10.70.0010      | 206   | 212  | TAGTAG  | hypothetical protein, conserved                                         |
|          | Tb927.5.2560      | 189   | 195  | TAGTAG  | hypothetical protein, conserved                                         |
|          | Tb927.3.2880      | 234   | 241  | TAGGTAG | hypothetical protein, conserved                                         |
| MITO     | Tb927.3.700       | 42    | 48   | TAGTAG  | hypothetical protein, conserved                                         |
| MITO     | Tb927.5.2170      | 130   | 136  | TAGTAT  | hypothetical protein, conserved                                         |
| MITO     | Tb927.4.720       | 102   | 109  | TAGGTAG | hypothetical protein, conserved                                         |
|          | Tb927.4.720       | 269   | 276  | TAGGTAG | hypothetical protein, conserved                                         |
| MITO     | Tb11.01.3860      | 112   | 118  | TAGTAT  | hypothetical protein, conserved                                         |
